# Supplementary material
Source: Springer Nature journal article supplement (https://publikationen.ub.uni-frankfurt.de/opus4/files/7207/12943_2009_465_MOESM4_ESM.PDF)
Supplement: MOESM4 [file 12943_2009_465_MOESM4_ESM.PDF]

**Additional file 4.** Most strongly influenced signalling pathways between the chemosensitive neuroblastoma cell line UKF-NB-3 and the doxorubicin-resistant sub-line UKF-NB-3<sup>rDOX</sup><sup>20</sup> as indicated by PANTHER pathway analysis of gene microarray (HGU133 Plus 2.0) expression data.

| <b>PANTHER signalling pathway</b> | <b>p-value</b>                          |
|-----------------------------------|-----------------------------------------|
| 1. Wnt signaling pathway          | $3.04 \times 10^{-7}$                   |
| 2. Cadherin signaling pathway     | $9.39 \times 10^{-7}$                   |
| 3. Ras pathway                    | $2.38 \times 10^{-6}$                   |
| <b>4. Angiogenesis</b>            | <b><math>5.54 \times 10^{-6}</math></b> |
| 5. B cell activation              | $2.20 \times 10^{-3}$                   |
